# Supplementary material for: Aggregation of Gold Nanoparticles Caused in Two Different Ways Involved in 4-Mercaptophenylboronic Acidand Hydrogen Peroxide
Source: PubMed Central journal article supplement (PMC6600739; doi:10.3390/ma12111802), 2019-06-03
Supplement: materials-12-01802-s001.pdf [file materials-12-01802-s001.pdf]

## Supplementary Material

# Aggregation of Gold Nanoparticles Caused in Two Different Ways Involved in 4-Mercaptophenylboronic Acid and Hydrogen Peroxide

Runmei Li <sup>1</sup>, Xuefan Gu <sup>2</sup>, Xingtang Liang <sup>1</sup>, Shi Hou <sup>1</sup> and Daodao Hu <sup>1,\*</sup>

<sup>1</sup> Engineering Research Center of Historical and Cultural Heritage Protection, Ministry of Education, School of Materials Science and Engineering, Shaanxi Normal University, Xi'an 710062, China

<sup>2</sup> College of Chemistry and Chemical Engineering, Xi'an Shiyu University, Xi'an 710065, China

\* Correspondence: Correspondence: [daodaohu@snnu.edu.cn](mailto:daodaohu@snnu.edu.cn); Tel: 0086-29-81530717; Fax: 0086-29-81530702

### Details in Characterization Techniques

#### *UV-Vis Spectroscopy*

A mixture (Mixt.1~Mixt.5 as shown in Table 1) solution (1 mL) was placed in a cuvette, and spectra were recorded within a wavelength range of 200–900 nm at room temperature. In the case of time-dependent measures, spectra of the reaction solution in a cuvette were recorded in situ.

#### *Nuclear Magnetic Resonance Spectroscopy*

In order to get a clear NMR signal for qualitative research, the amount of 4-MPBA was slightly higher (0.156M) than that used in Mixt.1 and Mixt.3 (0.15 mM), and it was dissolved in deuterated acetone followed by the addition of H<sub>2</sub>O<sub>2</sub> (0.94M). Then the <sup>11</sup>B, <sup>13</sup>C, and <sup>1</sup>H spectra of the mixture were determined in situ with time.

#### *Raman Spectroscopy*

A laser power of 5 mW was incident on the sample in a 2 μm<sup>2</sup> diameter spot through a standard microscope objective lens. The Raman spectra were collected with a data point acquisition time of 90 s and a spectral range of 400–3200 cm<sup>-1</sup>.

#### *Transmission Electron Microscopy*

20 uL of Mixt.1 with different concentrations of H<sub>2</sub>O<sub>2</sub> was dropped onto the covered carbon membrane copper grids and then dried in air before observation. The corresponding TEM images of citrate-capped AuNPs modified by 4-MPBA in the presence of different amounts of H<sub>2</sub>O<sub>2</sub> were obtained.

#### *X-Ray Photo-Electron Spectroscopy*

The pressure in the analysis chamber was greater than 5×10<sup>-9</sup> Torr. To ensure the accuracy of the measured data, all binding energies were calibrated relative to the C 1s peak (284.6 eV) from hydrocarbons adsorbed onto the surface of the samples. In the investigation, the white precipitate formed during the reaction between 4-MPBA and H<sub>2</sub>O<sub>2</sub> (Table 1 Mixt.2) was characterized by XPS.

#### *Determination of pH Change*

The pH changes of the solutions involved in Table 1 (Mix.1, Mix.2, Mix.3) were monitored by a PB-10 pH meter (Sartorius, Germany).

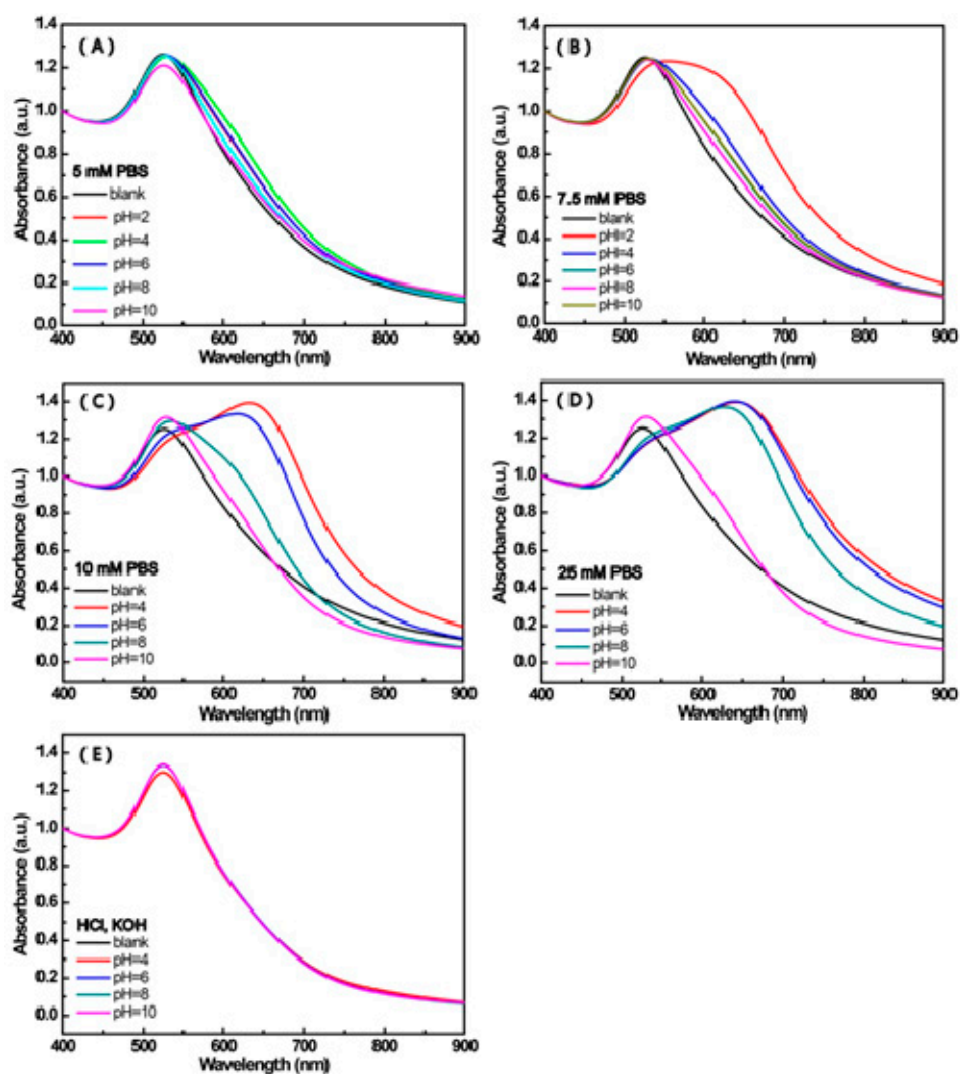

**Figure S1.** The change in the UV-Vis spectra of citrate-capped AuNPs modified by 4-MPBA (0.89 mM) with pH adjusted with different solutions. (A) 5 mM PBS; (B) 7.5 mM; (C) 10 mM; (D) 15 mM; (E) HCl and NaOH.

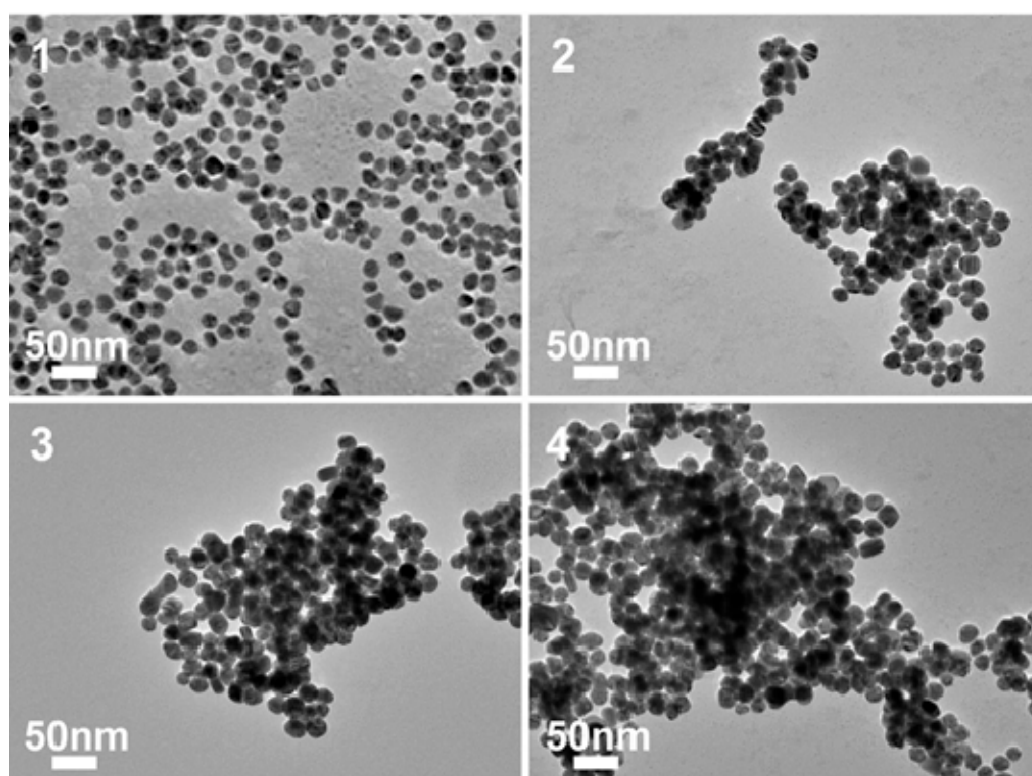

**Figure S2.** The TEM images of citrate-capped AuNPs modified by 4-MPBA (0.16 mM) in the presence of different amount of H<sub>2</sub>O<sub>2</sub>. (1): 0; (2): 0.039%; (3): 0.058%; (4): 0.077%.

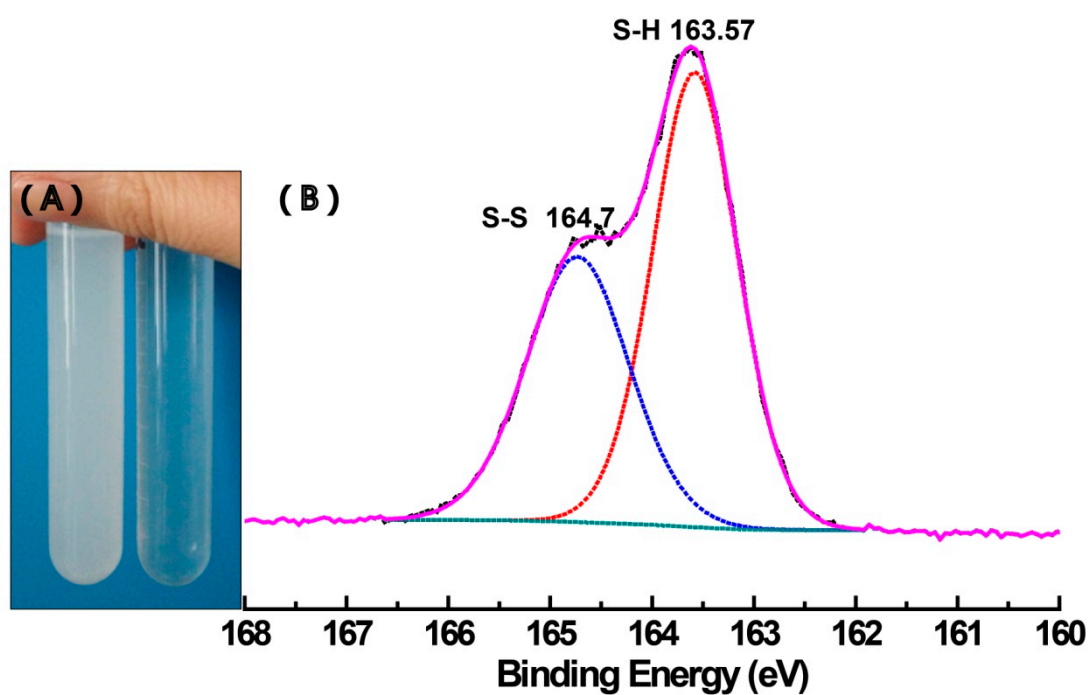

**Figure S3.** The photo of the white precipitate formed during the reaction of 4-MPBA and H<sub>2</sub>O<sub>2</sub> (A) and the XPS spectrum of S<sub>2p<sub>3/2</sub></sub> for the white precipitate (B).
